# Supplementary material for: Radiotherapy Can Cause Haemostasis in Bleeding Skin Malignancies
Source: Hindawi journal article supplement (doi:10.1155/2012/168681), 2012-01-01
Supplement: f1 [file 168681.f1.pdf]

## SUPPLEMENTARY MATERIAL

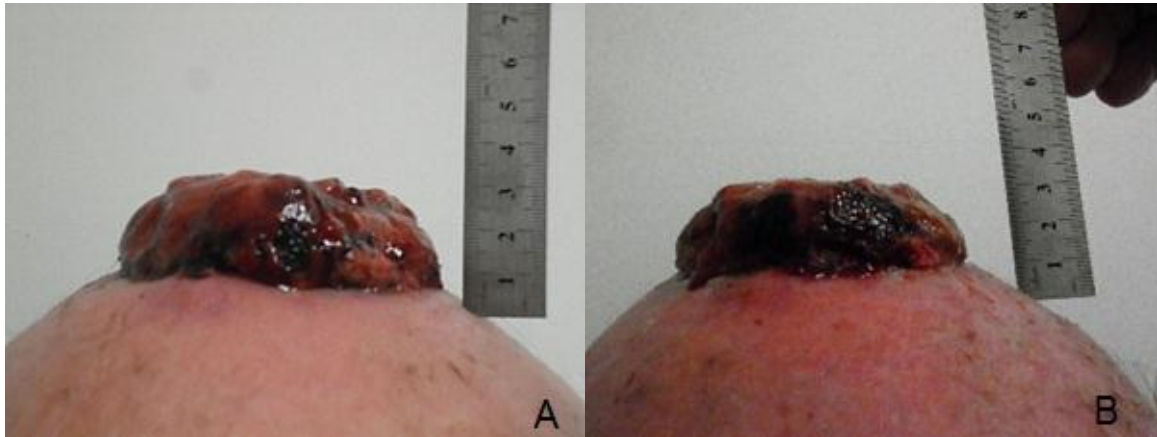

**Supplementary Figure 1.** Anterior view of the lesion during the second course of radiotherapy (40 Gy/20 fractions) in the patient of Case 1. Image A is taken at 34 Gy (that is, 14 Gy after the initial 20 Gy) and image B is taken at 40 Gy (that is, 20 Gy after the initial 20 Gy). Reduction in tumour size can be appreciated here.
